# Supplementary material
Source: publisher figshare collection journal article supplement (https://f1000.figshare.com/ndownloader/files/1439551)
Supplement: Supplementary file 1 [file 1439551]

AgamOR	OnubOR	McarOR
54.3	29.3	36.0
54.1	40.5	39.9
59.1	31.1	38.8
